# Supplementary material for: The Spatial and Temporal Impact of the February 26, 2023, Dust Storm on the Meteorological Conditions and Particulate Matter Concentrations Across New Mexico and West Texas
Source: Copernicus journal article supplement (doi:10.5194/egusphere-2024-113), 2024-01-19

**GOES-East Dust RGB** 22:02 UTC 26-Feb-2023

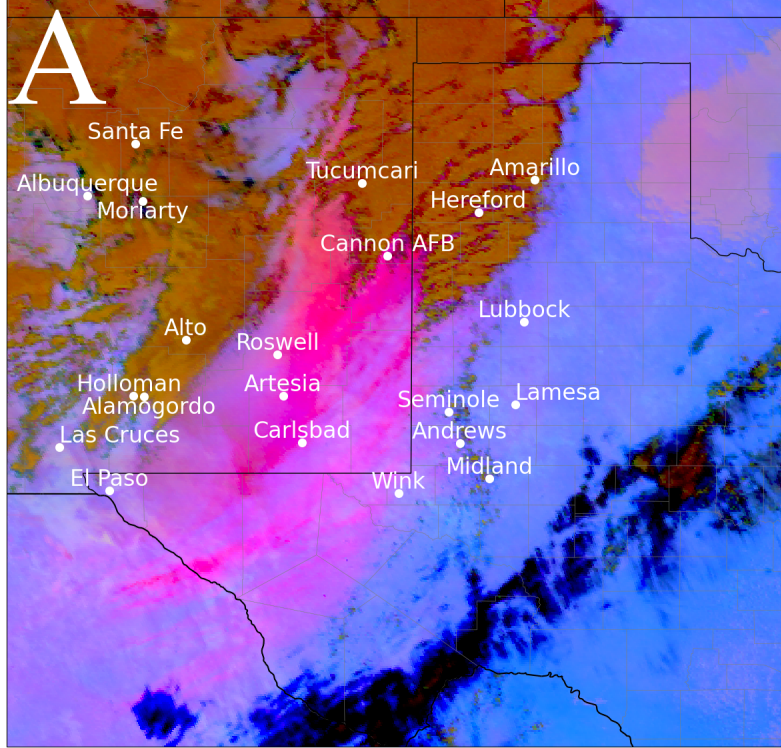

**GOES-East Dust RGB** 23:02 UTC 26-Feb-2023

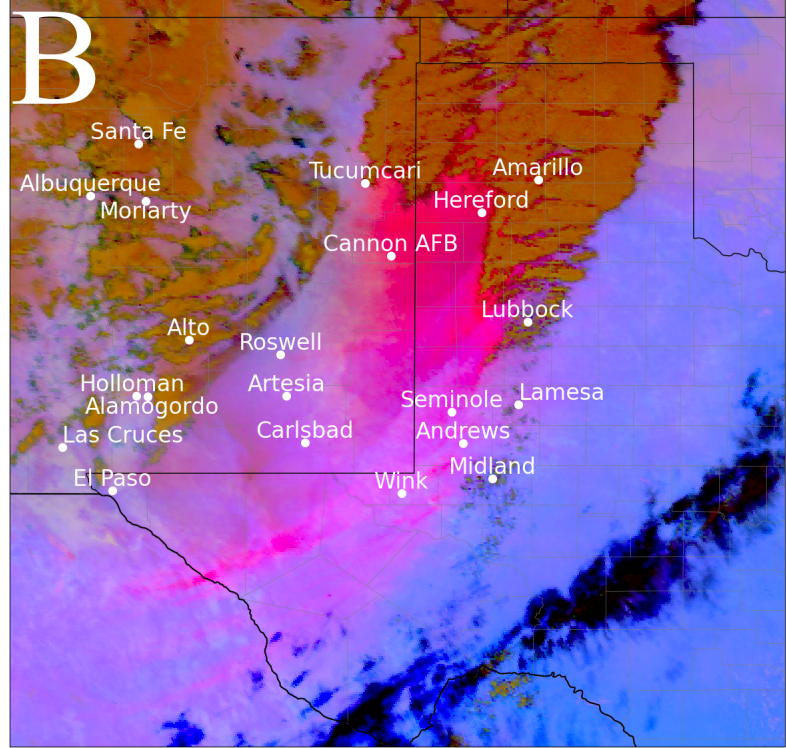

**GOES-East Dust RGB** 00:02 UTC 27-Feb-2023

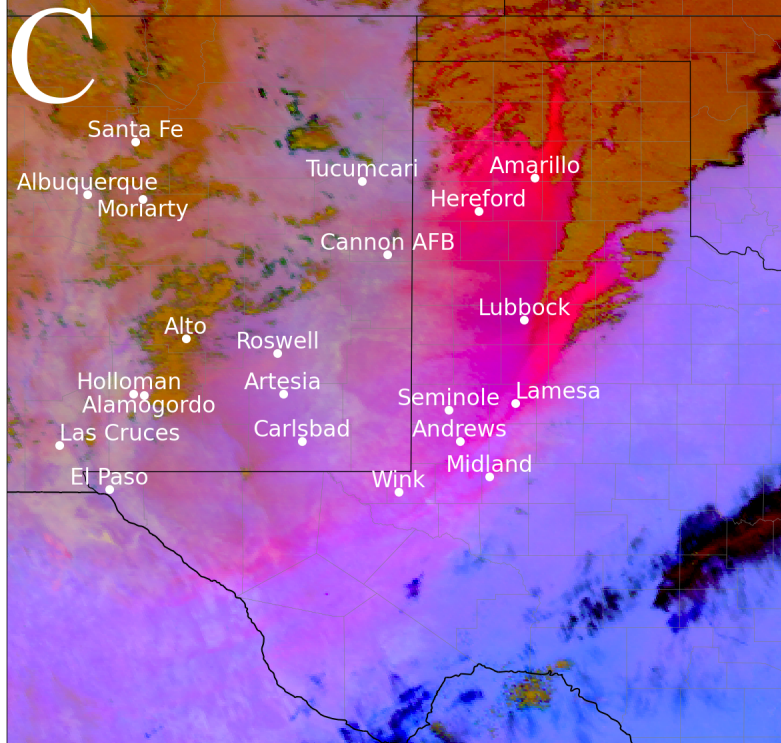

**GOES-East Dust RGB** 01:02 UTC 27-Feb-2023

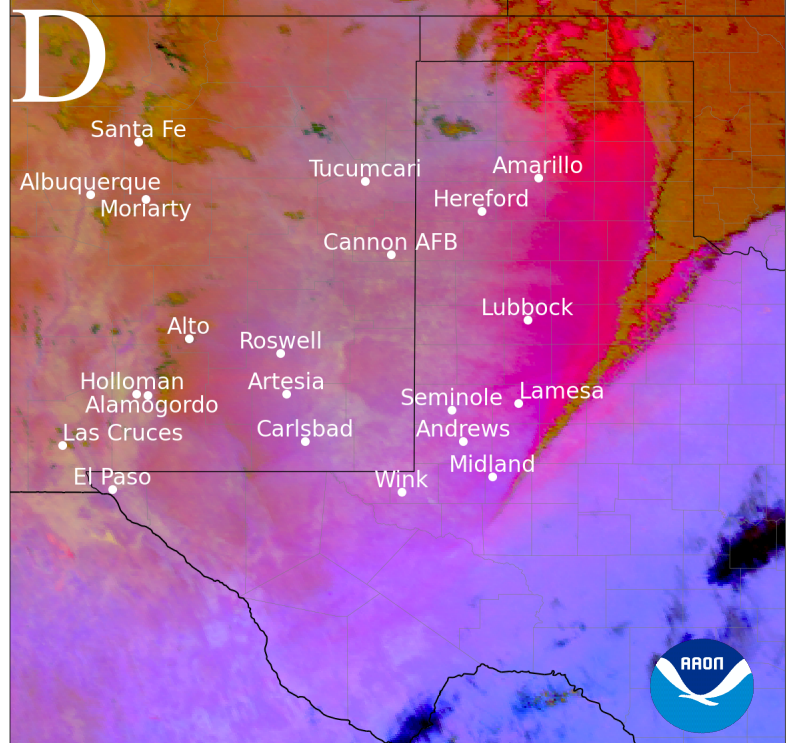

Supplement: Supplementary file 1 [file egusphere-2024-113-supplement.zip]
