# Supplementary material for: The Spatial and Temporal Impact of the February 26, 2023, Dust Storm on the Meteorological Conditions and Particulate Matter Concentrations Across New Mexico and West Texas
Source: Copernicus journal article supplement (doi:10.5194/egusphere-2024-113), 2024-01-19
Supplement: Supplementary file 1 [file Supplement_final.docx]

The Spatial and Temporal Impact of the Dust Storm During February 26, 2023, on Meteorological Conditions and Air Quality Across New Mexico and West Texas

Robinson M. C.1 Schueth K.2 and Ardon-Dryer K.1

1 Department of Geosciences, Texas Tech University, Lubbock TX, USA 79409.

2 NOAA/National Weather Service, 2579 S Loop 289, Lubbock, Texas 79423 USA

*Correspondence to*: Karin Ardon-Dryer ([karin.ardon-dryer@ttu.edu)](mailto:karin.ardon-dryer@ttu.edu))

Supplement:

Table S1. Information on automatic Surface Observation Stations (ASOS) from New Mexico and Texas used in the analysis and information on the presence of weather observers in each ASOS.

| State | Station ID | City | Airport Name | Latitude | Longitude | Weather Observer |
| --- | --- | --- | --- | --- | --- | --- |
| Texas | KAMA | Amarillo | Rick Husband International Airport | 35.22 | -101.71 | No |
| KELP | El Paso | El Paso International Airport | 31.81 | -106.38 | Yes |
| KE11 | Andrews | Andrews | 32.33 | -102.53 | No |
| KGNC | Seminole | Gaines County Airport | 32.68 | -102.65 | No |
| KHRX | Hereford | Hereford Municipal Airport | 34.86 | -102.33 | No |
| KINK | Wink | Winkler County Airport | 31.78 | -103.20 | No |
| KLBB | Lubbock | Lubbock Preston Smith International Airport | 33.66 | -101.82 | Yes |
| KLUV | Lamesa | Lamesa Municipal Airport | 32.75 | -101.92 | No |
| KMAF | Midland | Midland International Air and Space Port Airport | 31.95 | -102.21 | No |
| New Mexico | KATS | Artesia | Artesia Municipal Airport | 32.85 | -104.47 | No |
| KCNM | Carlsbad | Cavern City Air Terminal | 32.34 | -104.26 | No |
| KCVN | Clovis | Clovis Regional Airport | 34.38 | -103.32 | No |
| KROW | Roswell | Roswell Air Center Airport | 33.30 | -104.53 | No |
| KTCC | Tucumcari | Tucumcari Municipal Airport | 35.18 | -103.60 | No |
| KLRU | Las Cruces | Las Cruces International Airport | 32.29 | -106.92 | No |
| KABQ | Albuquerque | Albuquerque International Sunport Airport | 35.04 | -106.61 | Yes |
| KALM | Alamogordo | Alamogordo-White Sans Regional Airport | 32.84 | -105.99 | No |
| KHMN | Alamogordo | Holloman Air Force Base | 32.85 | -106.11 | No |
| KSRR | Alto | Sierra Blanca Regional Airport | 33.46 | -105.53 | No |
| K0E0 | Moriarty | Moriarty Municipal Airport | 34.99 | -106.01 | No |
| KSAF | Santa Fe | Santa Fe Municipal Airport | 35.62 | -106.09 | No |

Table S2. Information on PM stations used in this study.

| State | EPA ID | Local Station ID | Location | Latitude | Longitude | PM2.5 | PM10 | PM10-2.5 |
| --- | --- | --- | --- | --- | --- | --- | --- | --- |
| Texas | 48-375-0320 | C320 | Amarillo | 35.20 | -101.91 | Yes | No | No |
| 48-303-1028 | C1028 | Lubbock | 33.59 | -101.79 | Yes | No | No |
| 48-135-1014 | C1014 | Midland/Odessa | 31.87 | -102.33 | Yes | No | No |
| 48-141-0057 | C49 | El Paso | 31.67 | -106.29 | Yes | Yes | Yes |
| 48-141-0055 | C37 | El Paso | 31.75 | -106.40 | Yes | No | No |
| 48-141-0044 | C41 | El Paso | 31.77 | -106.46 | Yes | Yes | Yes |
| New Mexico | 35-025-0008 | 5ZS | Hobbs | 32.73 | -103.12 | Yes | No | No |
| 35-013-0020 | 6ZK | Chaparral | 32.04 | -106.41 | No | Yes | No |
| 35-013-0019 | 6ZL | Holeman Rd | 32.42 | -106.67 | No | Yes | No |
| 35-013-0021 | 6ZM | Desert View | 31.79 | -106.58 | No | Yes | No |
| 35-013-0016 | 6CM | Anthony | 32.01 | -106.59 | Yes | Yes | Yes |
| 35-013-0024 | 6WM | West Mesa | 32.28 | -106.86 | No | Yes | No |
| 35-013-0025 | 6Q | Las Cruces | 32.31 | -106.75 | Yes | No | No |
| 35-001-0023 | Del Norte HS | Albuquerque | 35.13 | -106.59 | Yes | Yes | Yes |
| 35-001-1012 | Foothills | Albuquerque | 35.19 | -106.51 | Yes | Yes | Yes |
| 35-001-0026 | Jefferson | Albuquerque | 35.14 | -106.60 | Yes | Yes | Yes |
| 35-001-1013 | North Valley | Albuquerque | 35.19 | -106.61 | Yes | Yes | Yes |
| 35-001-2022 | San Jose | Albuquerque | 35.06 | -106.65 | Yes | Yes | Yes |
| 35-001-0029 | South Valley | Albuquerque | 35.02 | -106.66 | Yes | Yes | Yes |

Table S3. Meteorological parameters measured by ASOS stations during the dust event. The duration of the dust storm (DS) was reported only for stations reported visibility below 1 km.

|  | Station ID | Start Time (local time) | End Time (local time) | Duration of Dust Event (hour)* | Wind Speed at Start  (m s-1) | Wind Gust at Start  (m s-1) | Max Wind Speed During Dust Event (m s-1) | Max Wind Gust During Dust Event (m s-1) | Lowest Recorded Visibility (km) | Duration of DS (minutes) |
| --- | --- | --- | --- | --- | --- | --- | --- | --- | --- | --- |
| New Mexico | KATS | 12:35 | 17:55 | 5:20 | 21.6 | 26.2 | 24.7 | 31.9 | 2.8 |  |
| KCNM | 13:30 | 16:35 | 3:05 | 21.1 | NA | 23.2 | 31.9 | 4 |  |
| KCVN | 12:10 | 18:30 | 6:20 | 17 | NA | 25.7 | 31.9 | **0.4** | 50 |
| KCVS | 12:20 | 14:55 | 2:35 | 15.6 | 24.2 | 25.7 | 32.9 | 2.2 |  |
| KROW | 12:40 | 18:35 | 5:55 | 19 | 25.2 | 25.7 | 35 | **0.8** | 5 |
| KTCC | 12:20 | 17:45 | 5:25 | 20.1 | 26.8 | 27.3 | 37 | **0.8** | 10 |
| KLRU | 10:55 | 17:15 | 6:20 | 18 | 24.7 | 23.7 | 31.9 | 1.2 |  |
| KABQ | 10:15 | 13:45 | 3:30 | NA | 20.1 | 23.7 | 32.4 | 1.6 |  |
| KALM | 10:55 | 18:35 | 7:40 | 13.9 | 20.1 | 12.1 | 26.2 | **0.4** | 20 |
| KHMN | 12:17 | 18:44 | 6:27 | 9.7 | 29.3 | 25.2 | 29.3 | **0.8** | 6 |
| KSRR | 12:35 | 15:35 | 3:00 | 25.2 | 34 | 25.7 | 34 | 1.2 |  |
| K0E0 | 12:35 | 14:15 | 1:40 | 16.5 | 27.3 | 18.5 | 27.3 | 2.4 |  |
| KSAF | 11:30 | 11:55 | 0:25 | 13.4 | 20.1 | 15.4 | 23.7 | 2 |  |
| Texas | KAMA | 14:45 | 22:45 | 8:00 | 17 | 20.6 | 25.2 | 33.4 | 1.2 |  |
| KELP | 12:05 | 16:30 | 4:25 | 17 | 22.1 | 20.6 | 31.4 | 2.4 |  |
| KE11 | 16:15 | 19:35 | 3:20 | 18 | 23.7 | 18.5 | 25.2 | 4 |  |
| KGNC | 15:50 | 22:50 | 7:00 | 14.4 | 18.5 | 19.6 | 25.7 | 1.6 |  |
| KHRX | 13:55 | 21:55 | 8:00 | 14.9 | 20.1 | 26.2 | 30.4 | **0.4** | 65 |
| KINK | 14:50 | 20:20 | 5:30 | NA | NA | 23.2 | 31.9 | 1.2 |  |
| KLBB | 12:53 | 3:55 | 16:00 | 11.3 | 17.5 | 25.3 | 34 | **0** | 55 |
| KLUV | 12:15 | 3:35 | 15:20 | 12.4 | 15.4 | 20.1 | 24.7 | **0.81** | 40 |
| KMAF | 12:53 | 23:05 | 10:12 | 10.8 | 15.4 | 20.6 | 28.8 | 2 |  |

*Calculations of duration were based on times when dust particles were present in the air (visibility lower than 16.1 km)

Table S4. Measurements of PM2.5 and PM10 as measured during the February 26 dust storm.

| PM | Location | Station ID | Daily PM values (µg m -3) | | | | | R2 for wind speed & PM | | PM values during time of dust (µg m-3) | | | | | |
| --- | --- | --- | --- | --- | --- | --- | --- | --- | --- | --- | --- | --- | --- | --- | --- |
| Min | Max | Average ± SD | | | Linear reg. | Polynomial reg. | Number of hours with high PM | Max | Increase ratio of PM | Average ± SD | | |
| PM2.5 | Amarillo | C320 | 9 | 161 | 36 | ± | 39.9 | 0.41 | **0.57** | 6 | 161 | 4.6 | 93.7 | ± | 42.4 |
| Lubbock | C1028 | 3.9 | 518.4 | 69.3 | ± | 121.3 | 0.15 | 0.18 | 12 | 518.4 | 22.6 | 153.9 | ± | 134.7 |
| Odessa | C1014 | 5 | 102 | 18.3 | ± | 19.8 | 0.28 | **0.51** | 2 | 102 | 3.9 | 74.5 | ± | 38.9 |
| El Paso | C37 | 14 | 346.2 | 53.6 | ± | 69 | 0.25 | 0.4 | 5 | 346.2 | 17.2 | 147.6 | ± | 113.8 |
| Hobbs | 5ZS | 2 | 142 | 21.1 | ± | 33.7 | 0.47 | **0.77** | 3 | 142 | 11.8 | 99.7 | ± | 47.1 |
| Las Cruces | 6Q | 2 | 127 | 18.8 | ± | 28.8 | 0.37 | **0.7** | 2 | 127 | 21.2 | 107 | ± | 28.3 |
| El Paso | C49 | 3.2 | 132.6 | 22.3 | ± | 35.8 | 0.47 | **0.88** | 10 | 132.6 | 33.2 | 45.2 | ± | 47.7 |
| El Paso | C41 | 0 | 109 | 19.8 | ± | 29.6 | 0.27 | **0.71** | 10 | 109 | 11.5 | 34.8 | ± | 41.6 |
| Anthony | 6CM | 0 | 239 | 20.5 | ± | 47.8 | 0.34 | **0.79** | 9 | 239 | 39.8 | 43.3 | ± | 74.6 |
| Albuquerque | Del Norte HS | 1.1 | 21.1 | 6.7 | ± | 5.8 | 0.02 | **0.73** | 4 | 18.7 | 3.2 | 9.6 | ± | 6.2 |
| Albuquerque | Foothills | 0.6 | 13.6 | 3.8 | ± | 2.7 | 0.22 | 0.23 | 4 | 13.6 | 3.8 | 8.4 | ± | 4 |
| Albuquerque | Jefferson | 1.1 | 62.8 | 8.8 | ± | 12.9 | 0.16 | **0.8** | 4 | 62.8 | 9.0 | 23 | ± | 26.6 |
| Albuquerque | North Valley | 1.9 | 16.6 | 7 | ± | 4.4 | 0.01 | 0.49 | 4 | 16.6 | 3.0 | 9.6 | ± | 4.9 |
| Albuquerque | San Jose | 1.3 | 45.6 | 7.5 | ± | 8.9 | 0.14 | **0.9** | 4 | 45.6 | 7.7 | 18.3 | ± | 18.3 |
| Albuquerque | South Valley | 1 | 112.3 | 13.6 | ± | 22.1 | 0.14 | **0.9** | 6 | 112.3 | 9.9 | 26.6 | ± | 42.2 |
| PM10 | El Paso | C49 | 9.9 | 999.4 | 205.1 | ± | 320.9 | **0.6** | **0.86** | 10 | 999.4 | 44.4 | 461.4 | ± | 371.5 |
| El Paso | C41 | 6 | 503 | 88.4 | ± | 114.6 | 0.4 | **0.73** | 10 | 572 | 11.9 | 204.1 | ± | 168.5 |
| Chaparral | 6ZK | 2 | 2254 | 278.2 | ± | 508.6 | 0.35 | 0.44 | 11 | 2254 | 93.9 | 577.1 | ± | 643 |
| Desert View | 6ZM | 2 | 9983 | 748.4 | ± | 2089.7 | 0.4 | **0.72** | 10 | 9983 | 1426.1 | 1752.6 | ± | 3039 |
| Las Cruces | 6ZL | 2 | 9968 | 700.8 | ± | 2198.5 | 0.36 | **0.7** | 7 | 9868 | 704.9 | 2353.7 | ± | 3745 |
| Anthony | 6CM | 2 | 3475 | 323.2 | ± | 741.9 | **0.52** | **0.87** | 9 | 3475 | 119.8 | 803 | ± | 1080 |
| Las Cruces | 6WM | 0 | 4469 | 415 | ± | 1065.8 | 0.42 | **0.67** | 8 | 4469 | 235.2 | 1212.1 | ± | 1626 |
| Albuquerque | Del Norte HS | 4.2 | 289.6 | 37.1 | ± | 57.8 | 0.33 | **0.9** | 4 | 289.6 | 13.3 | 123.6 | ± | 112.3 |
| Albuquerque | Foothills | 2.9 | 197.5 | 28.1 | ± | 42.3 | 0.33 | 0.37 | 4 | 197.5 | 11.3 | 104.3 | ± | 112.3 |
| Albuquerque | Jefferson | 4.3 | 988.3 | 76.7 | ± | 199.3 | 0.3 | **0.87** | 4 | 985.5 | 25.5 | 332.5 | ± | 435.8 |
| Albuquerque | North Valley | 4.6 | 985.5 | 86.3 | ± | 199.8 | **0.5** | **0.86** | 4 | 346.8 | 15.9 | 170.8 | ± | 120.3 |
| Albuquerque | San Jose | 5.6 | 346.8 | 46.8 | ± | 72.1 | 0.36 | **0.88** | 4 | 988.3 | 45.1 | 357.1 | ± | 421.8 |
| Albuquerque | South Valley | 5 | 2143.2 | 136.7 | ± | 431.2 | 0.31 | **0.86** | 6 | 2143.2 | 72.4 | 469.5 | ± | 822.8 |


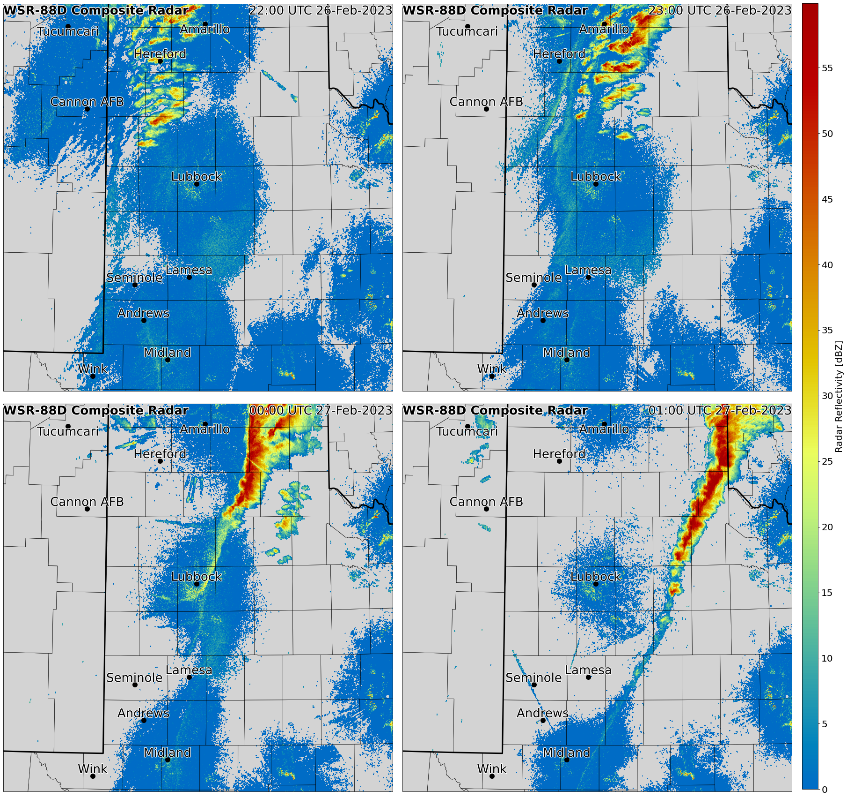


**Figure S1**. Radar imagery of the dust storm from 26 February 22:00 UTC to 27 February 01:00 UTC.


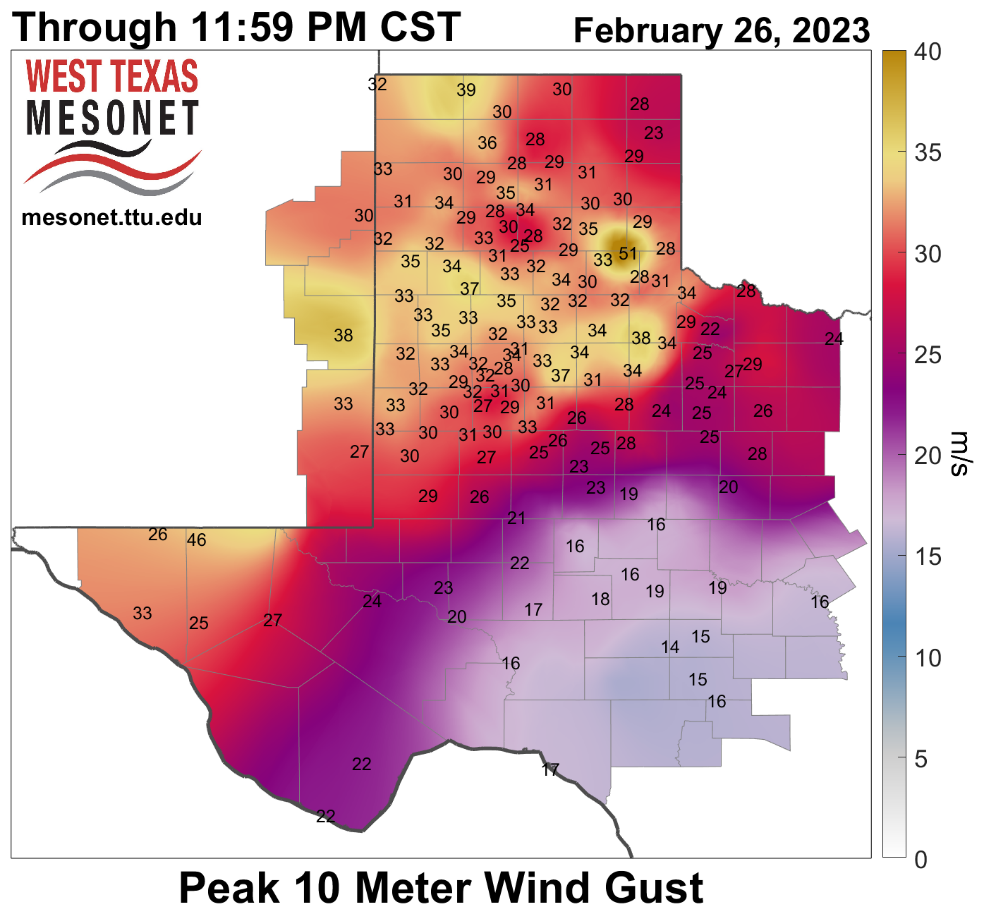


**Figure S2.** Daily maximum wind gusts measured on 26 February measured by West Texas Mesonet stations.


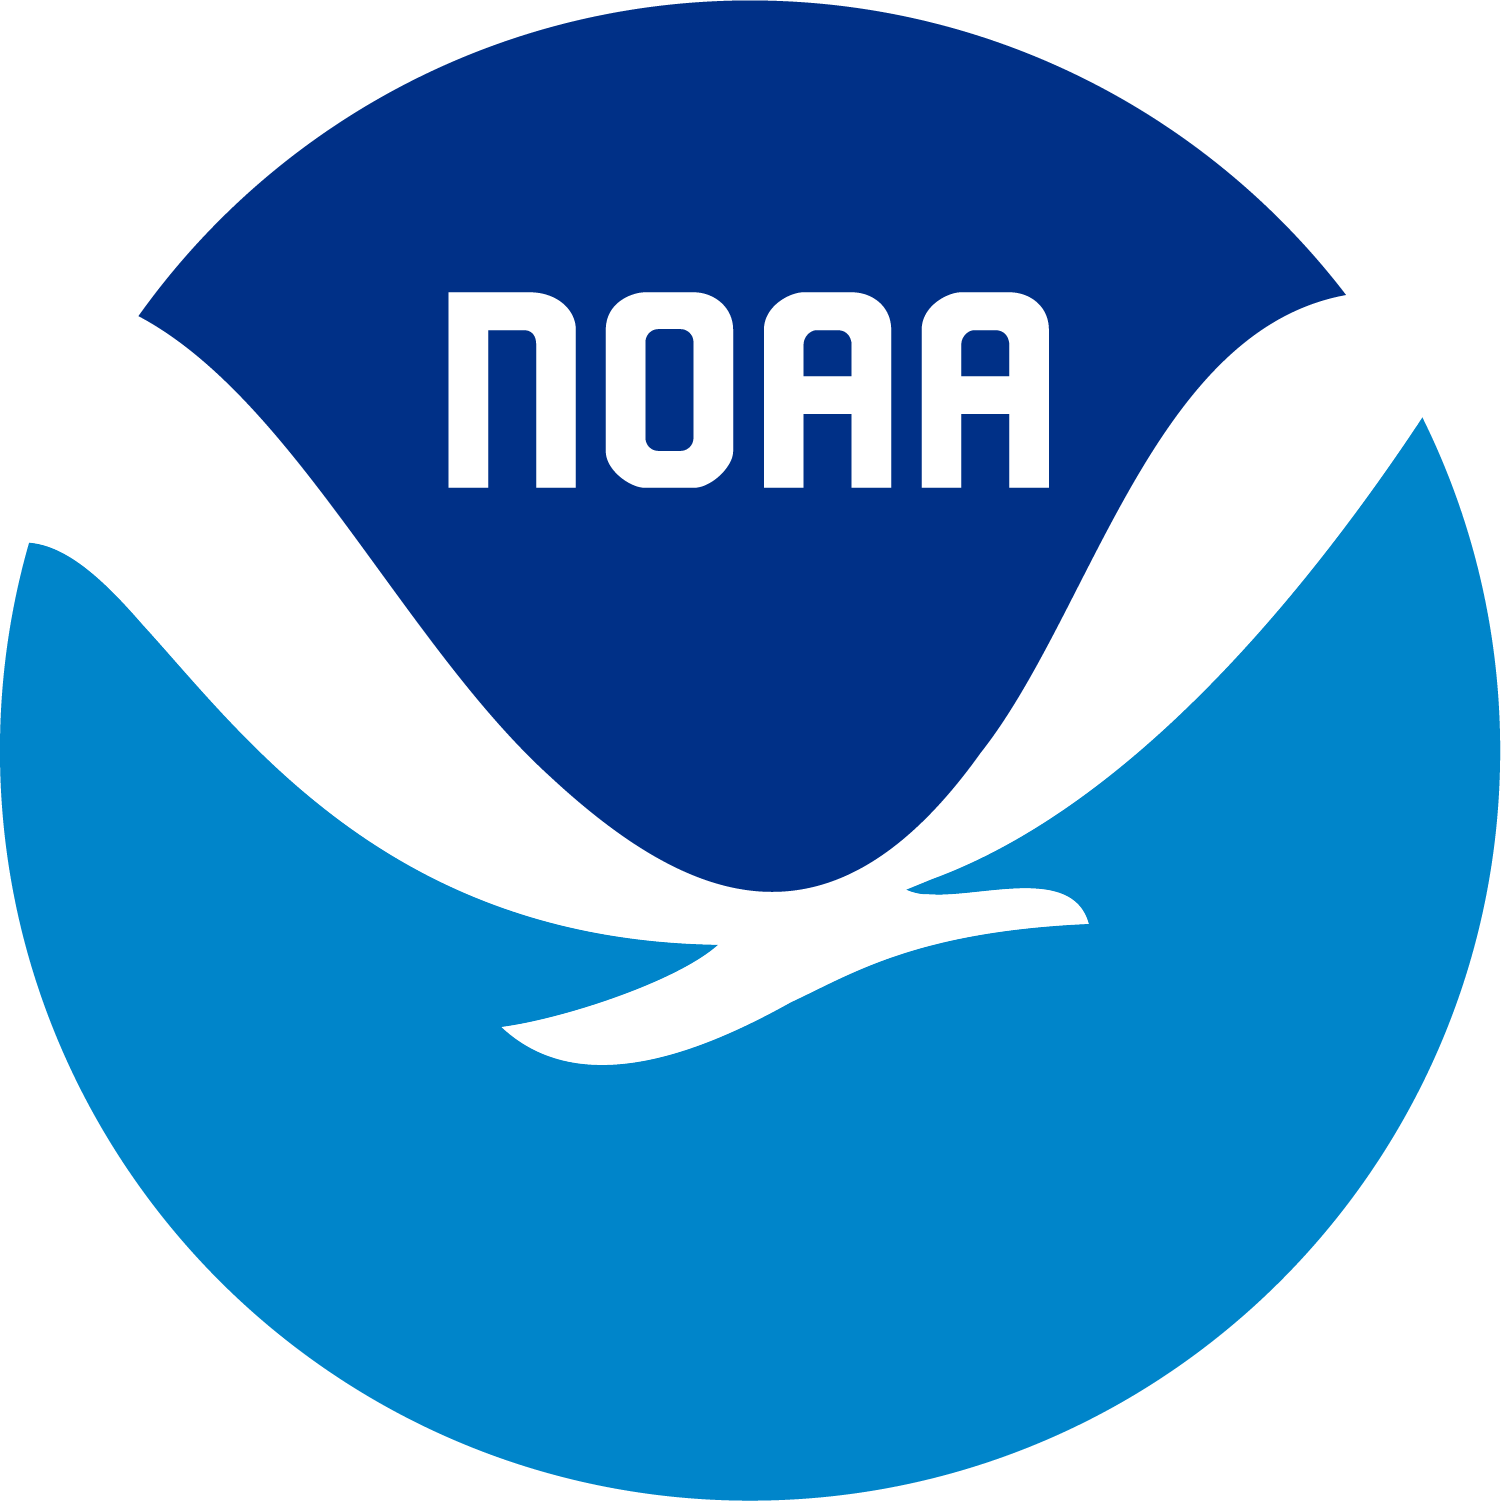


**Figure S3.** GOES-East Dust RGB from 26-27 February, at four different times (A) 16:00 central local time, 22:02 UTC, (B) 17:00 local central time, 23:02 UTC (C) 18:00 local central time, 00:02 UTC, and (D) 19:00 local central time, 01:02 UTC.


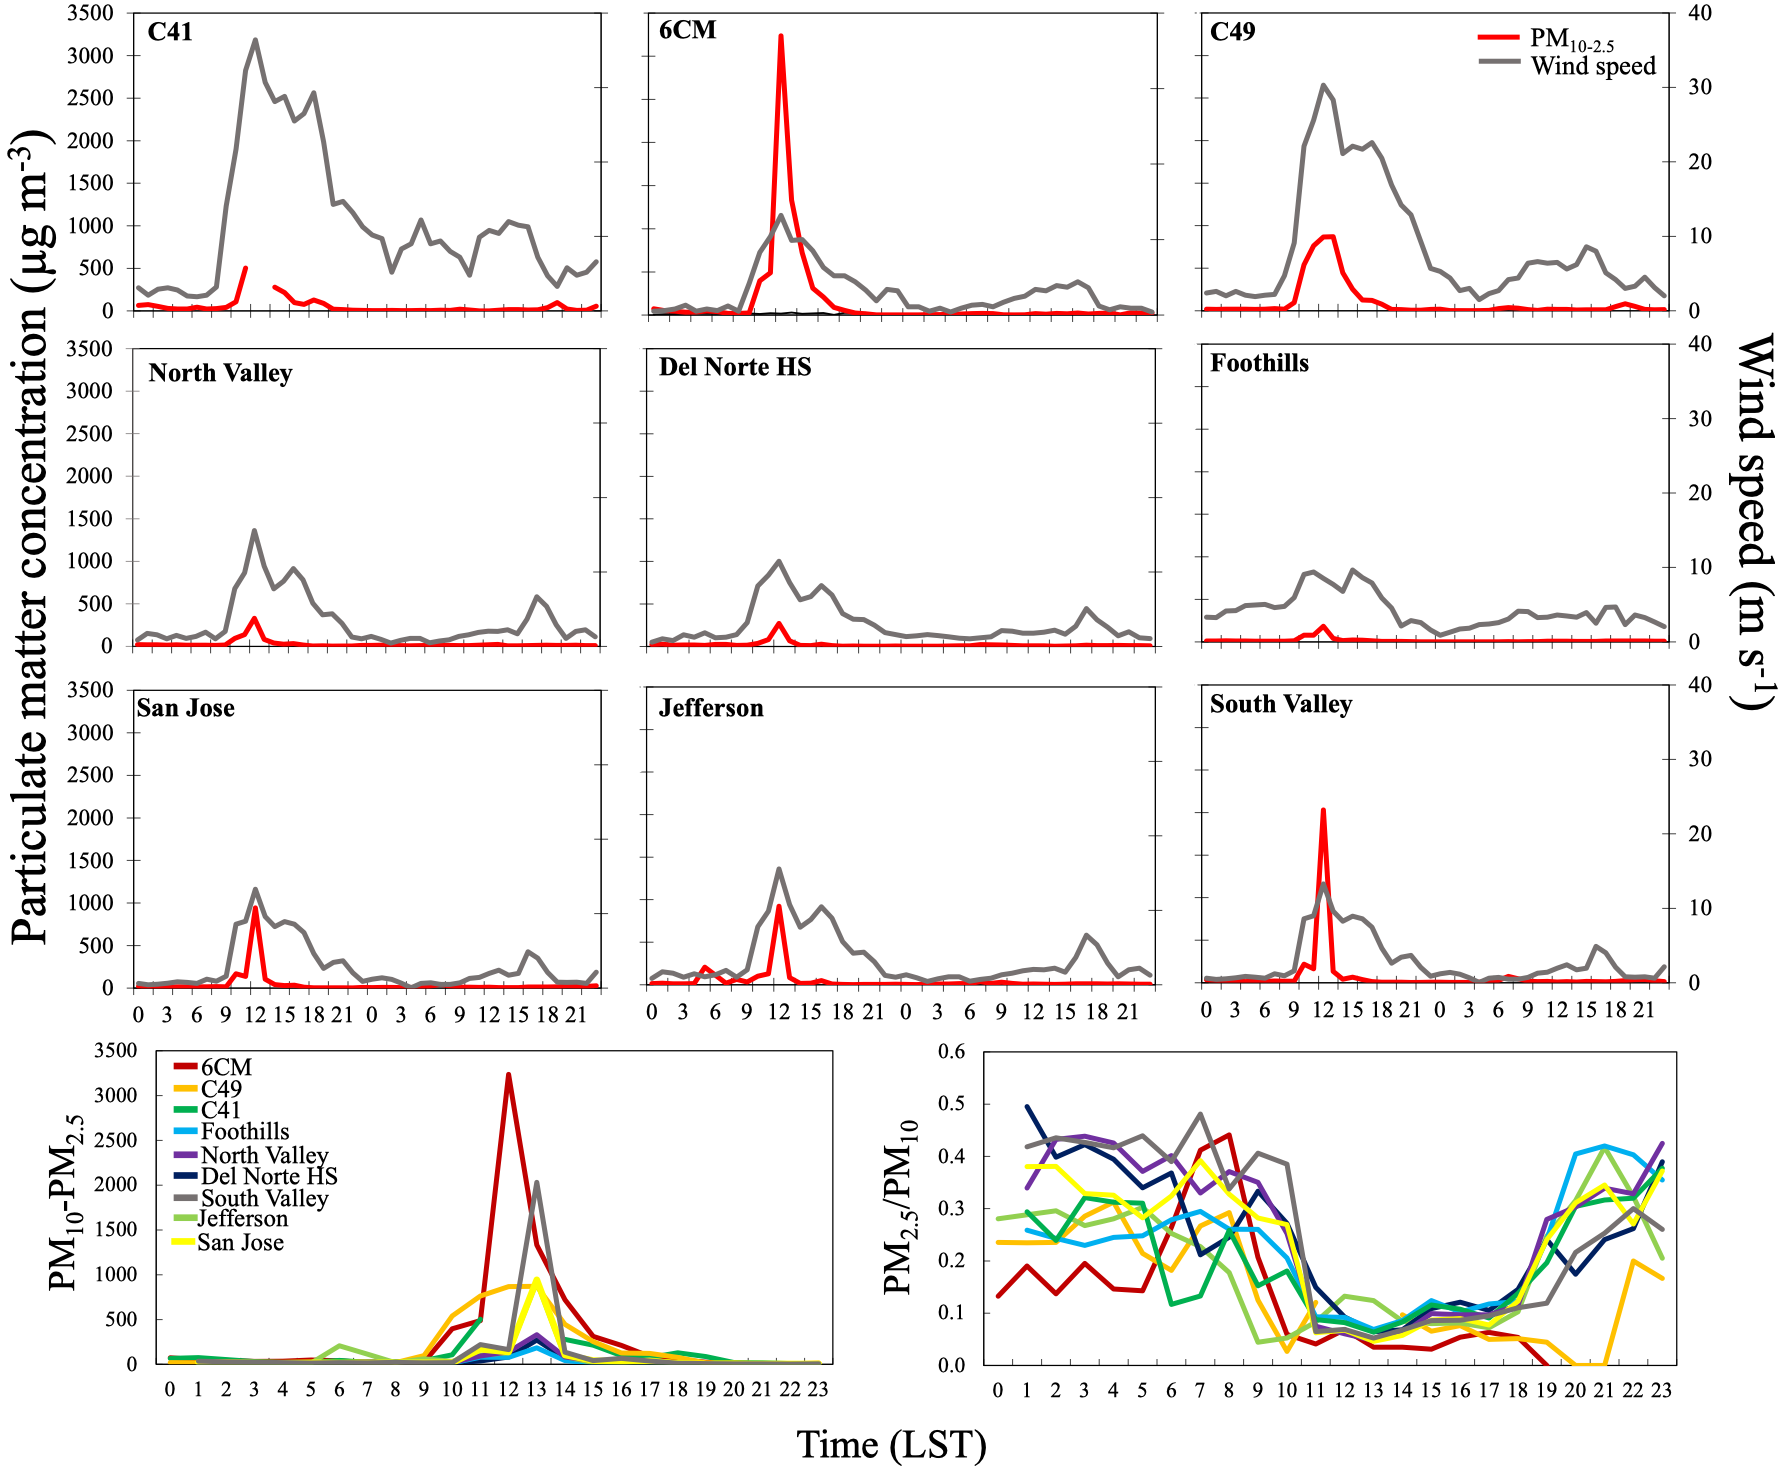


**Figure S4**. Measurements of PM10-2.5 concentrations (in red) and wind speed (in gray) for each station. and t PM10-2.5 concentrations and the ratios of PM2.5/10 from stations, each color for a different station.
