# Supplementary figures and images for: The Spatial and Temporal Impact of the February 26, 2023, Dust Storm on the Meteorological Conditions and Particulate Matter Concentrations Across New Mexico and West Texas
Source: Copernicus journal article supplement (doi:10.5194/egusphere-2024-113), 2024-01-19

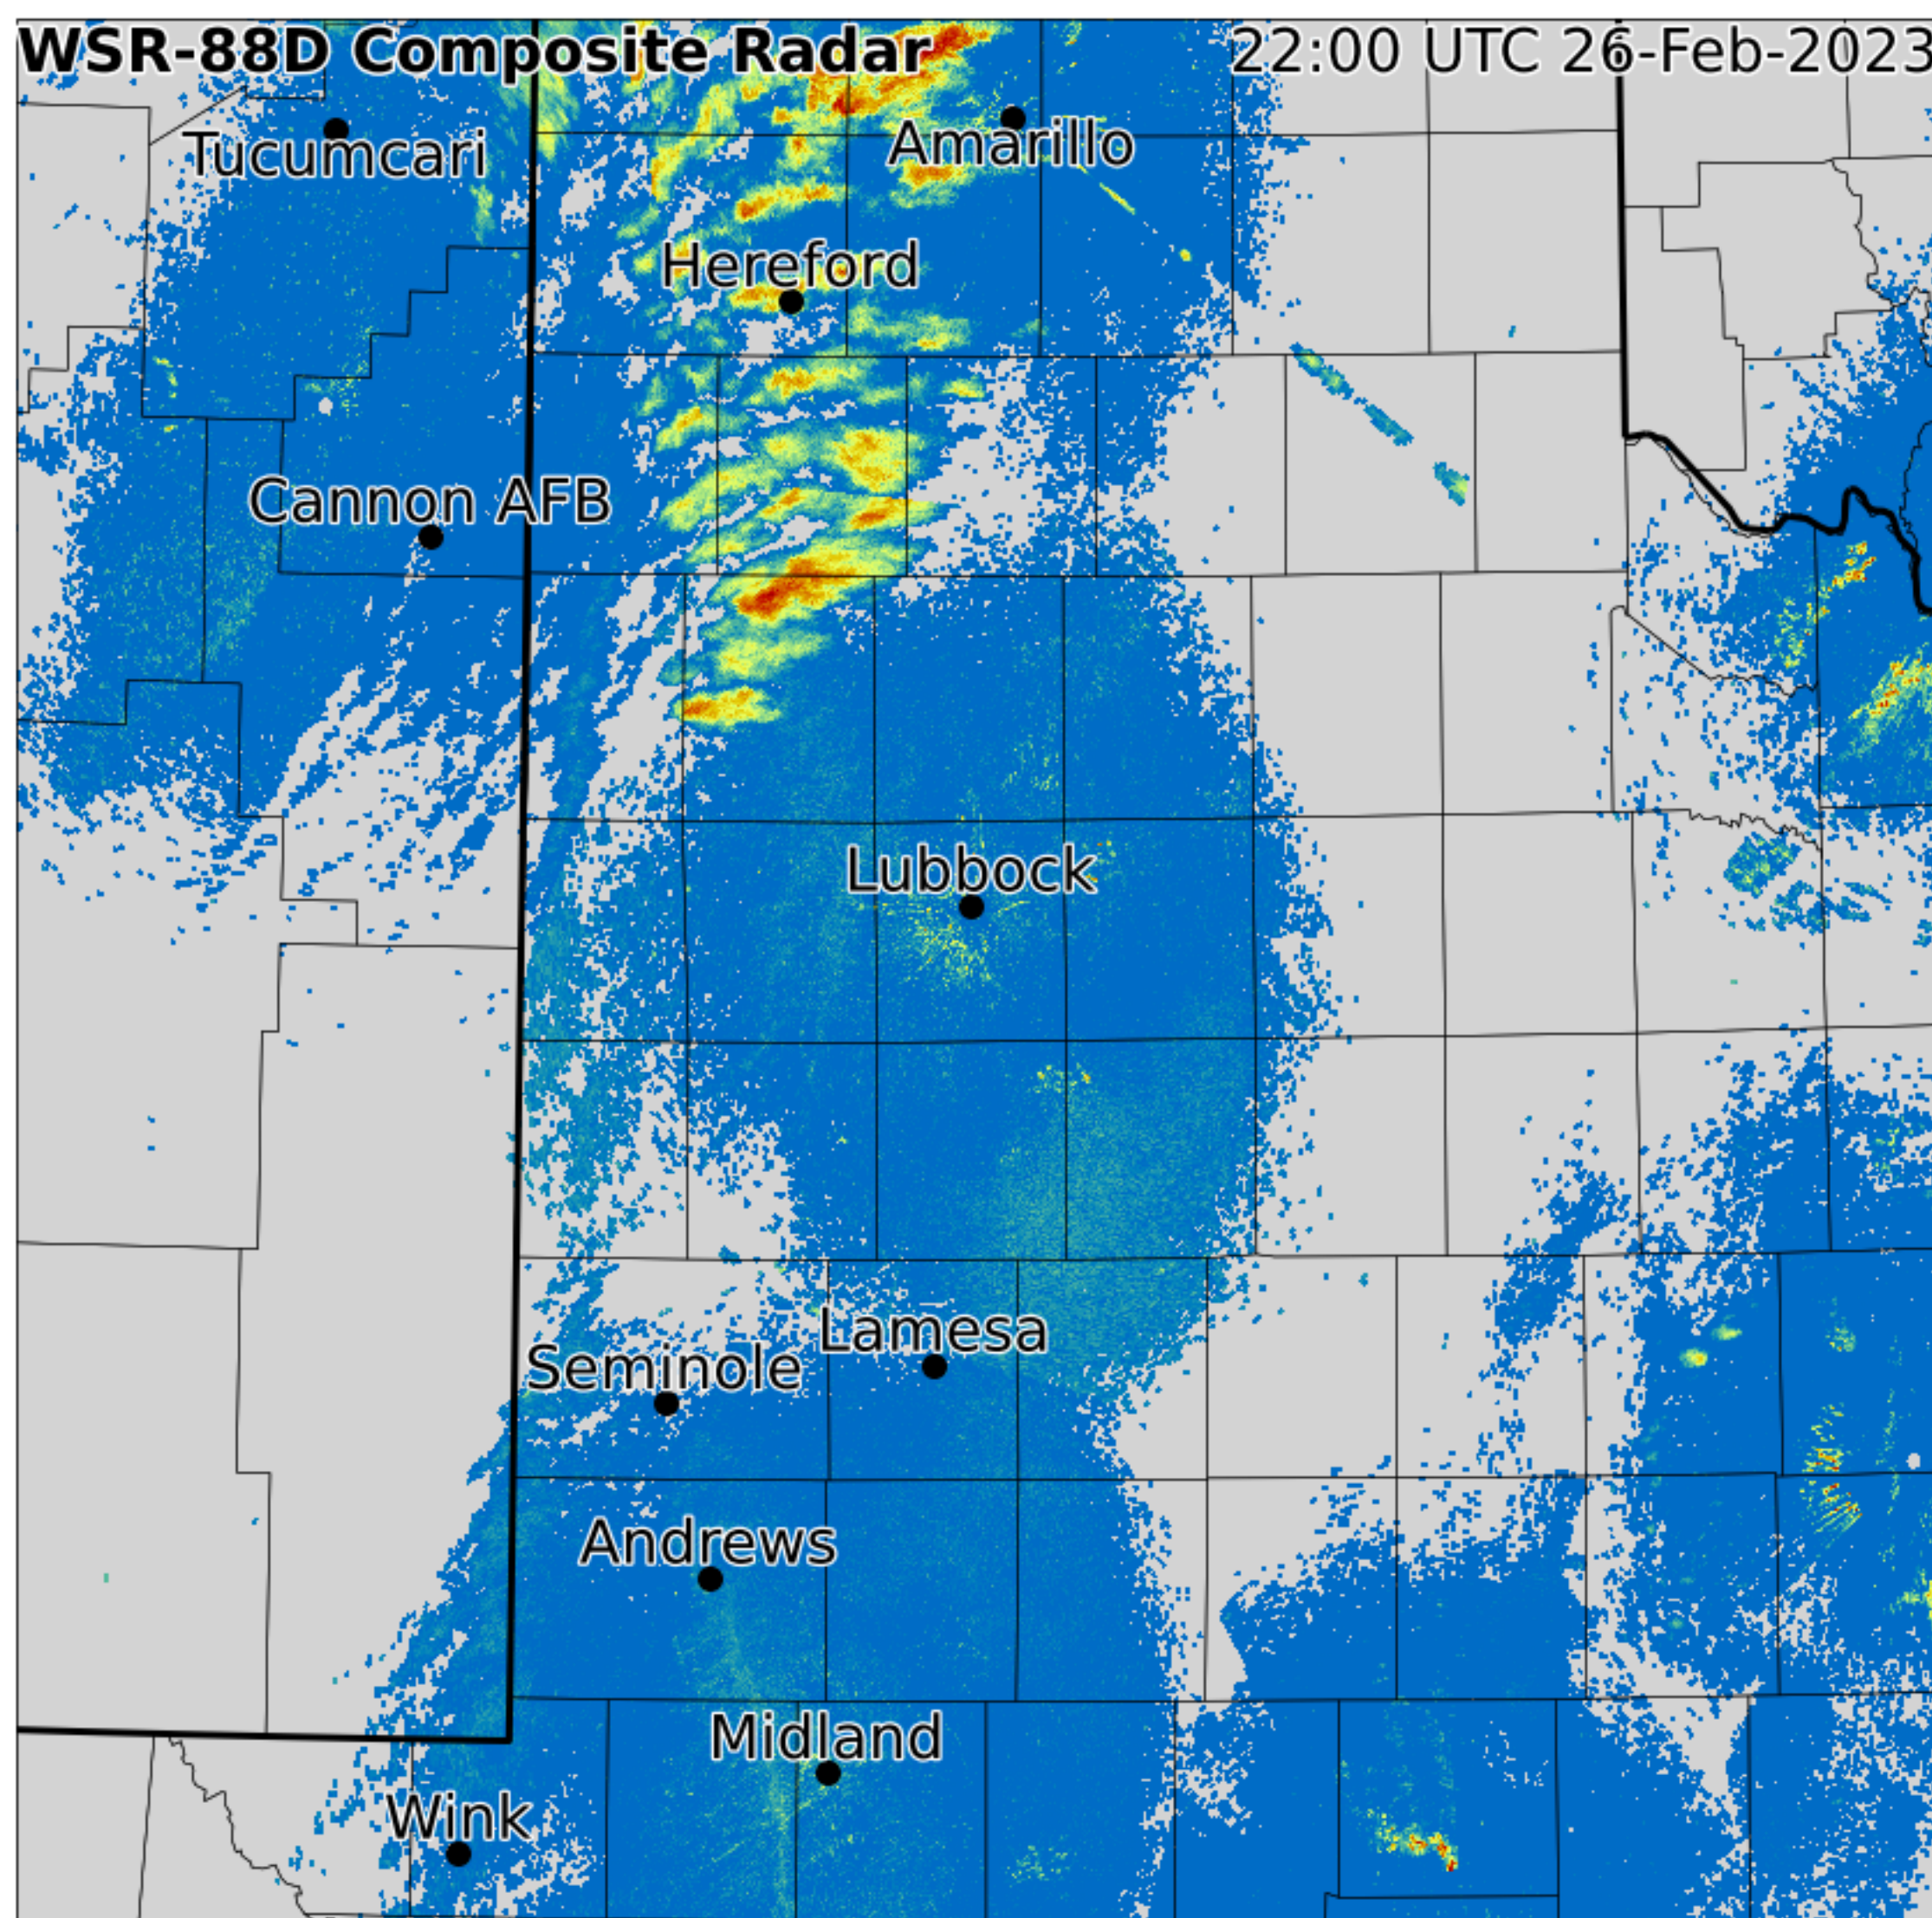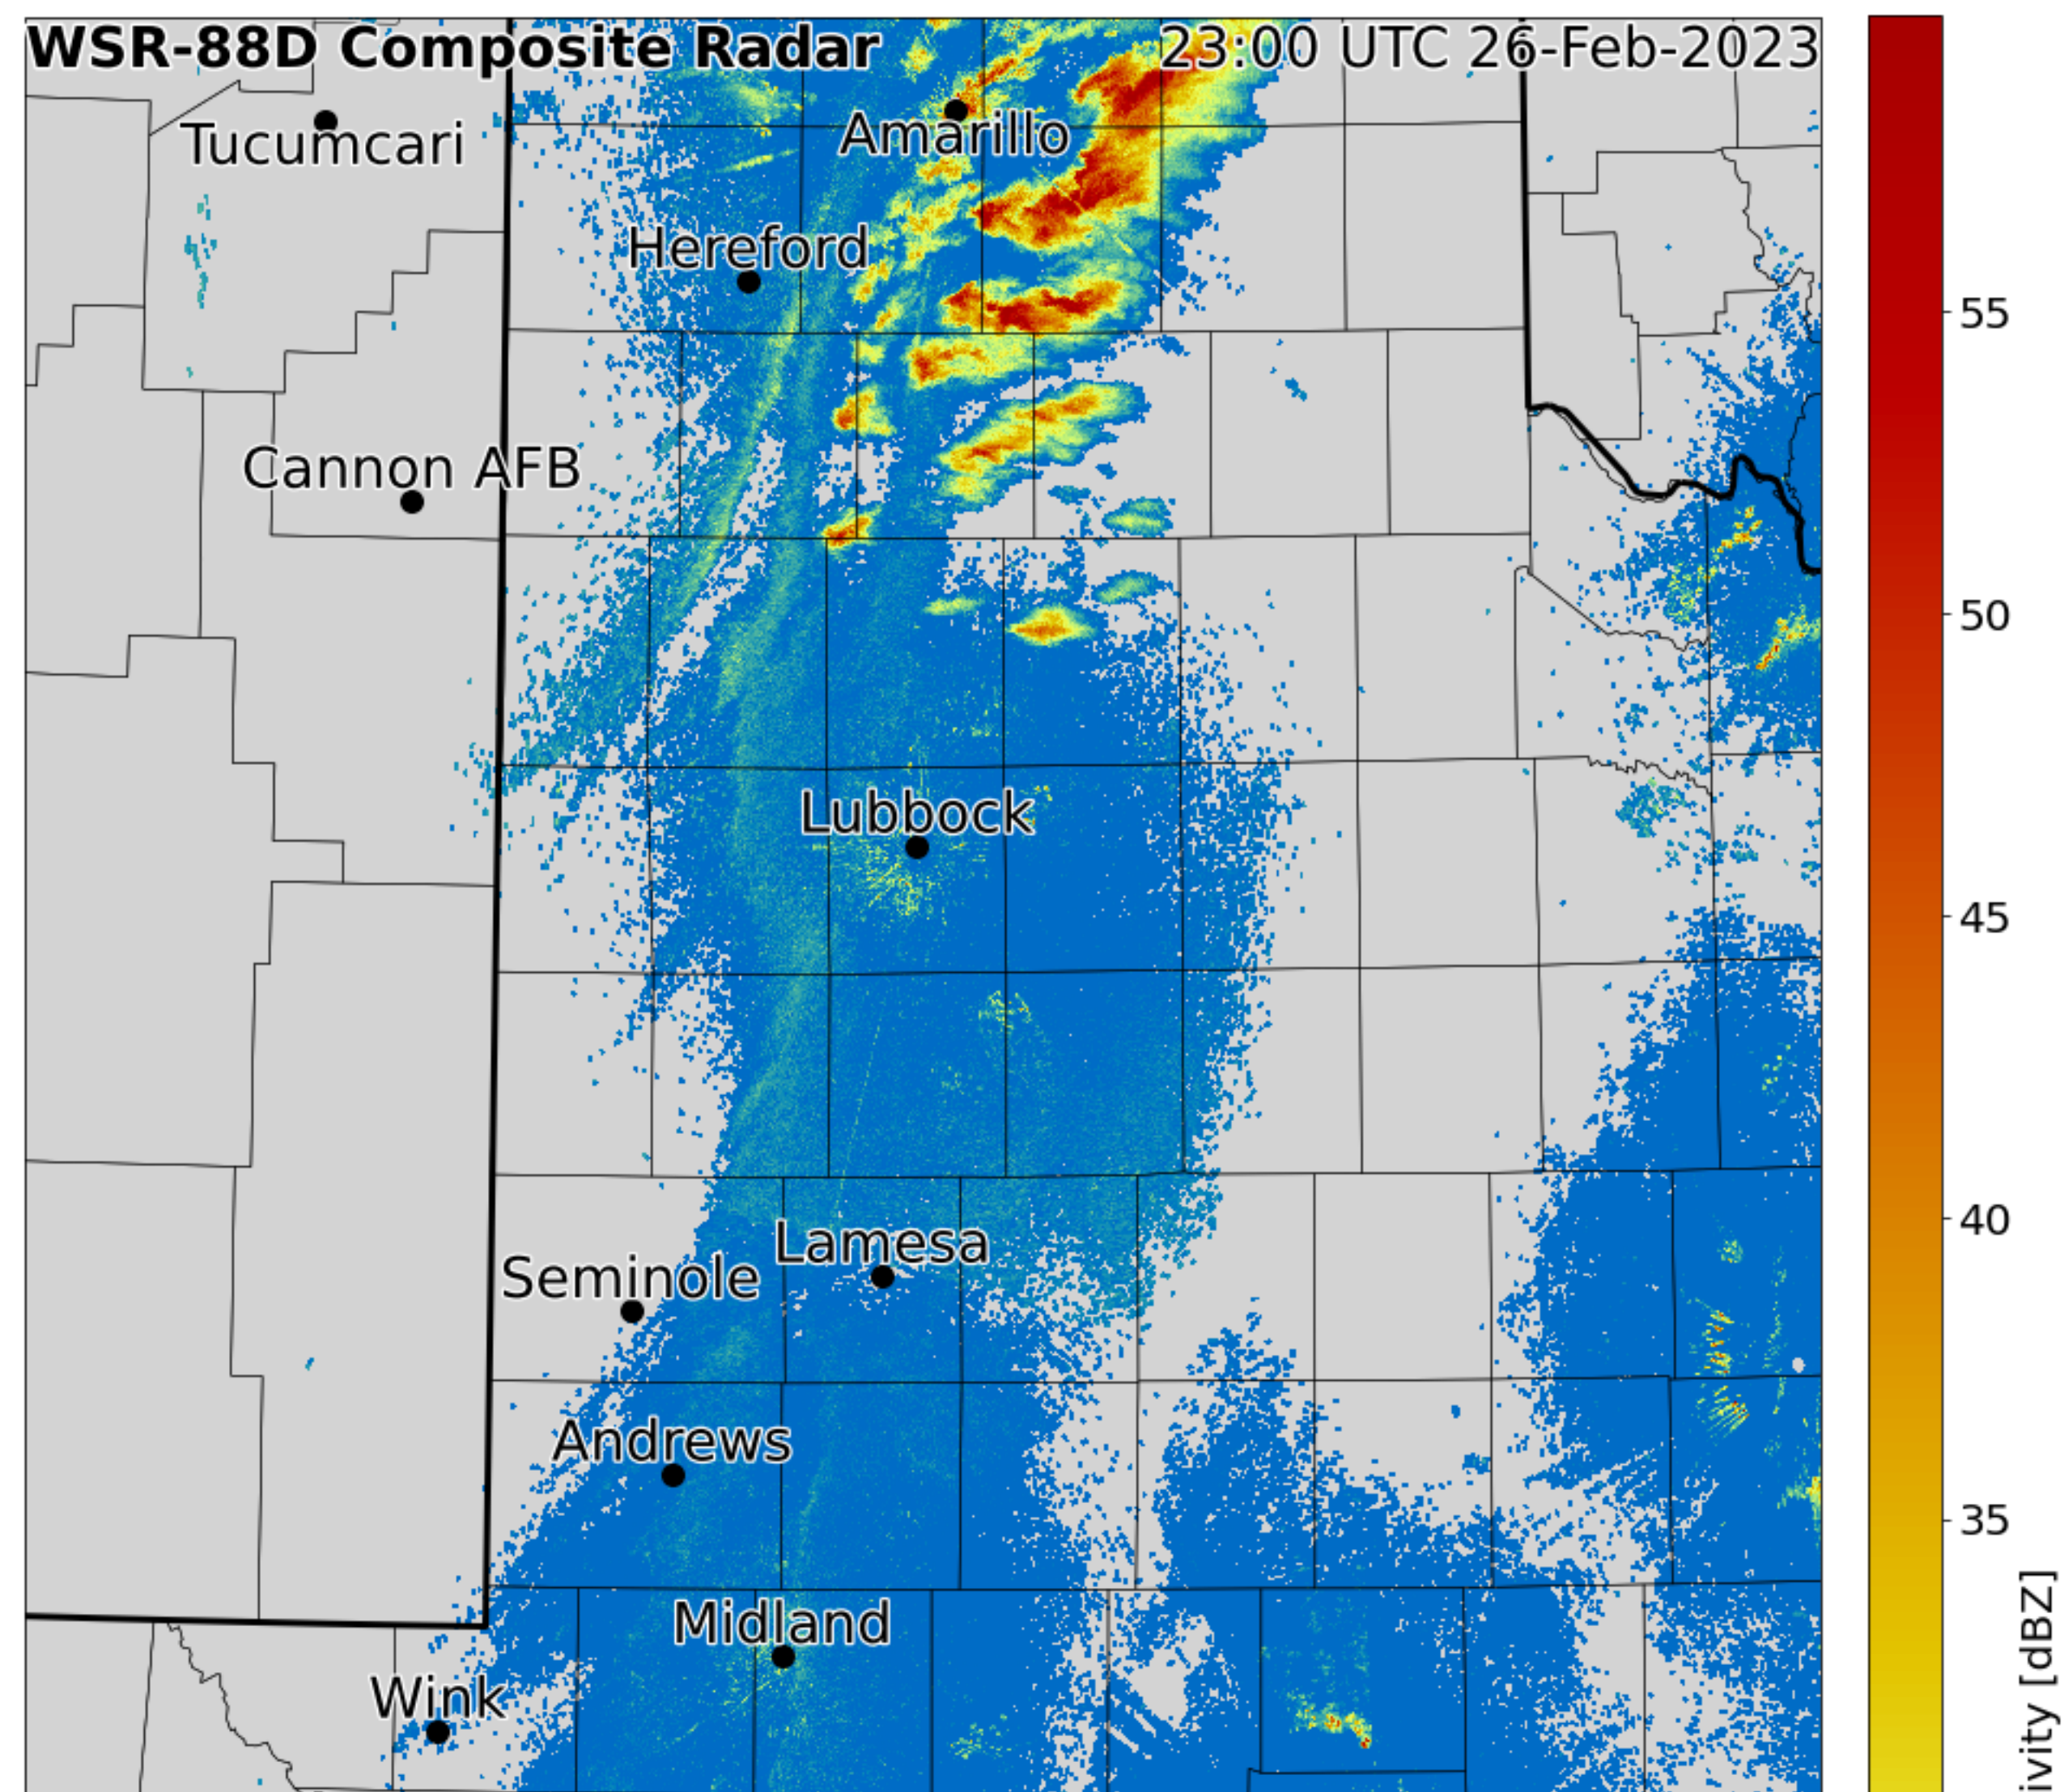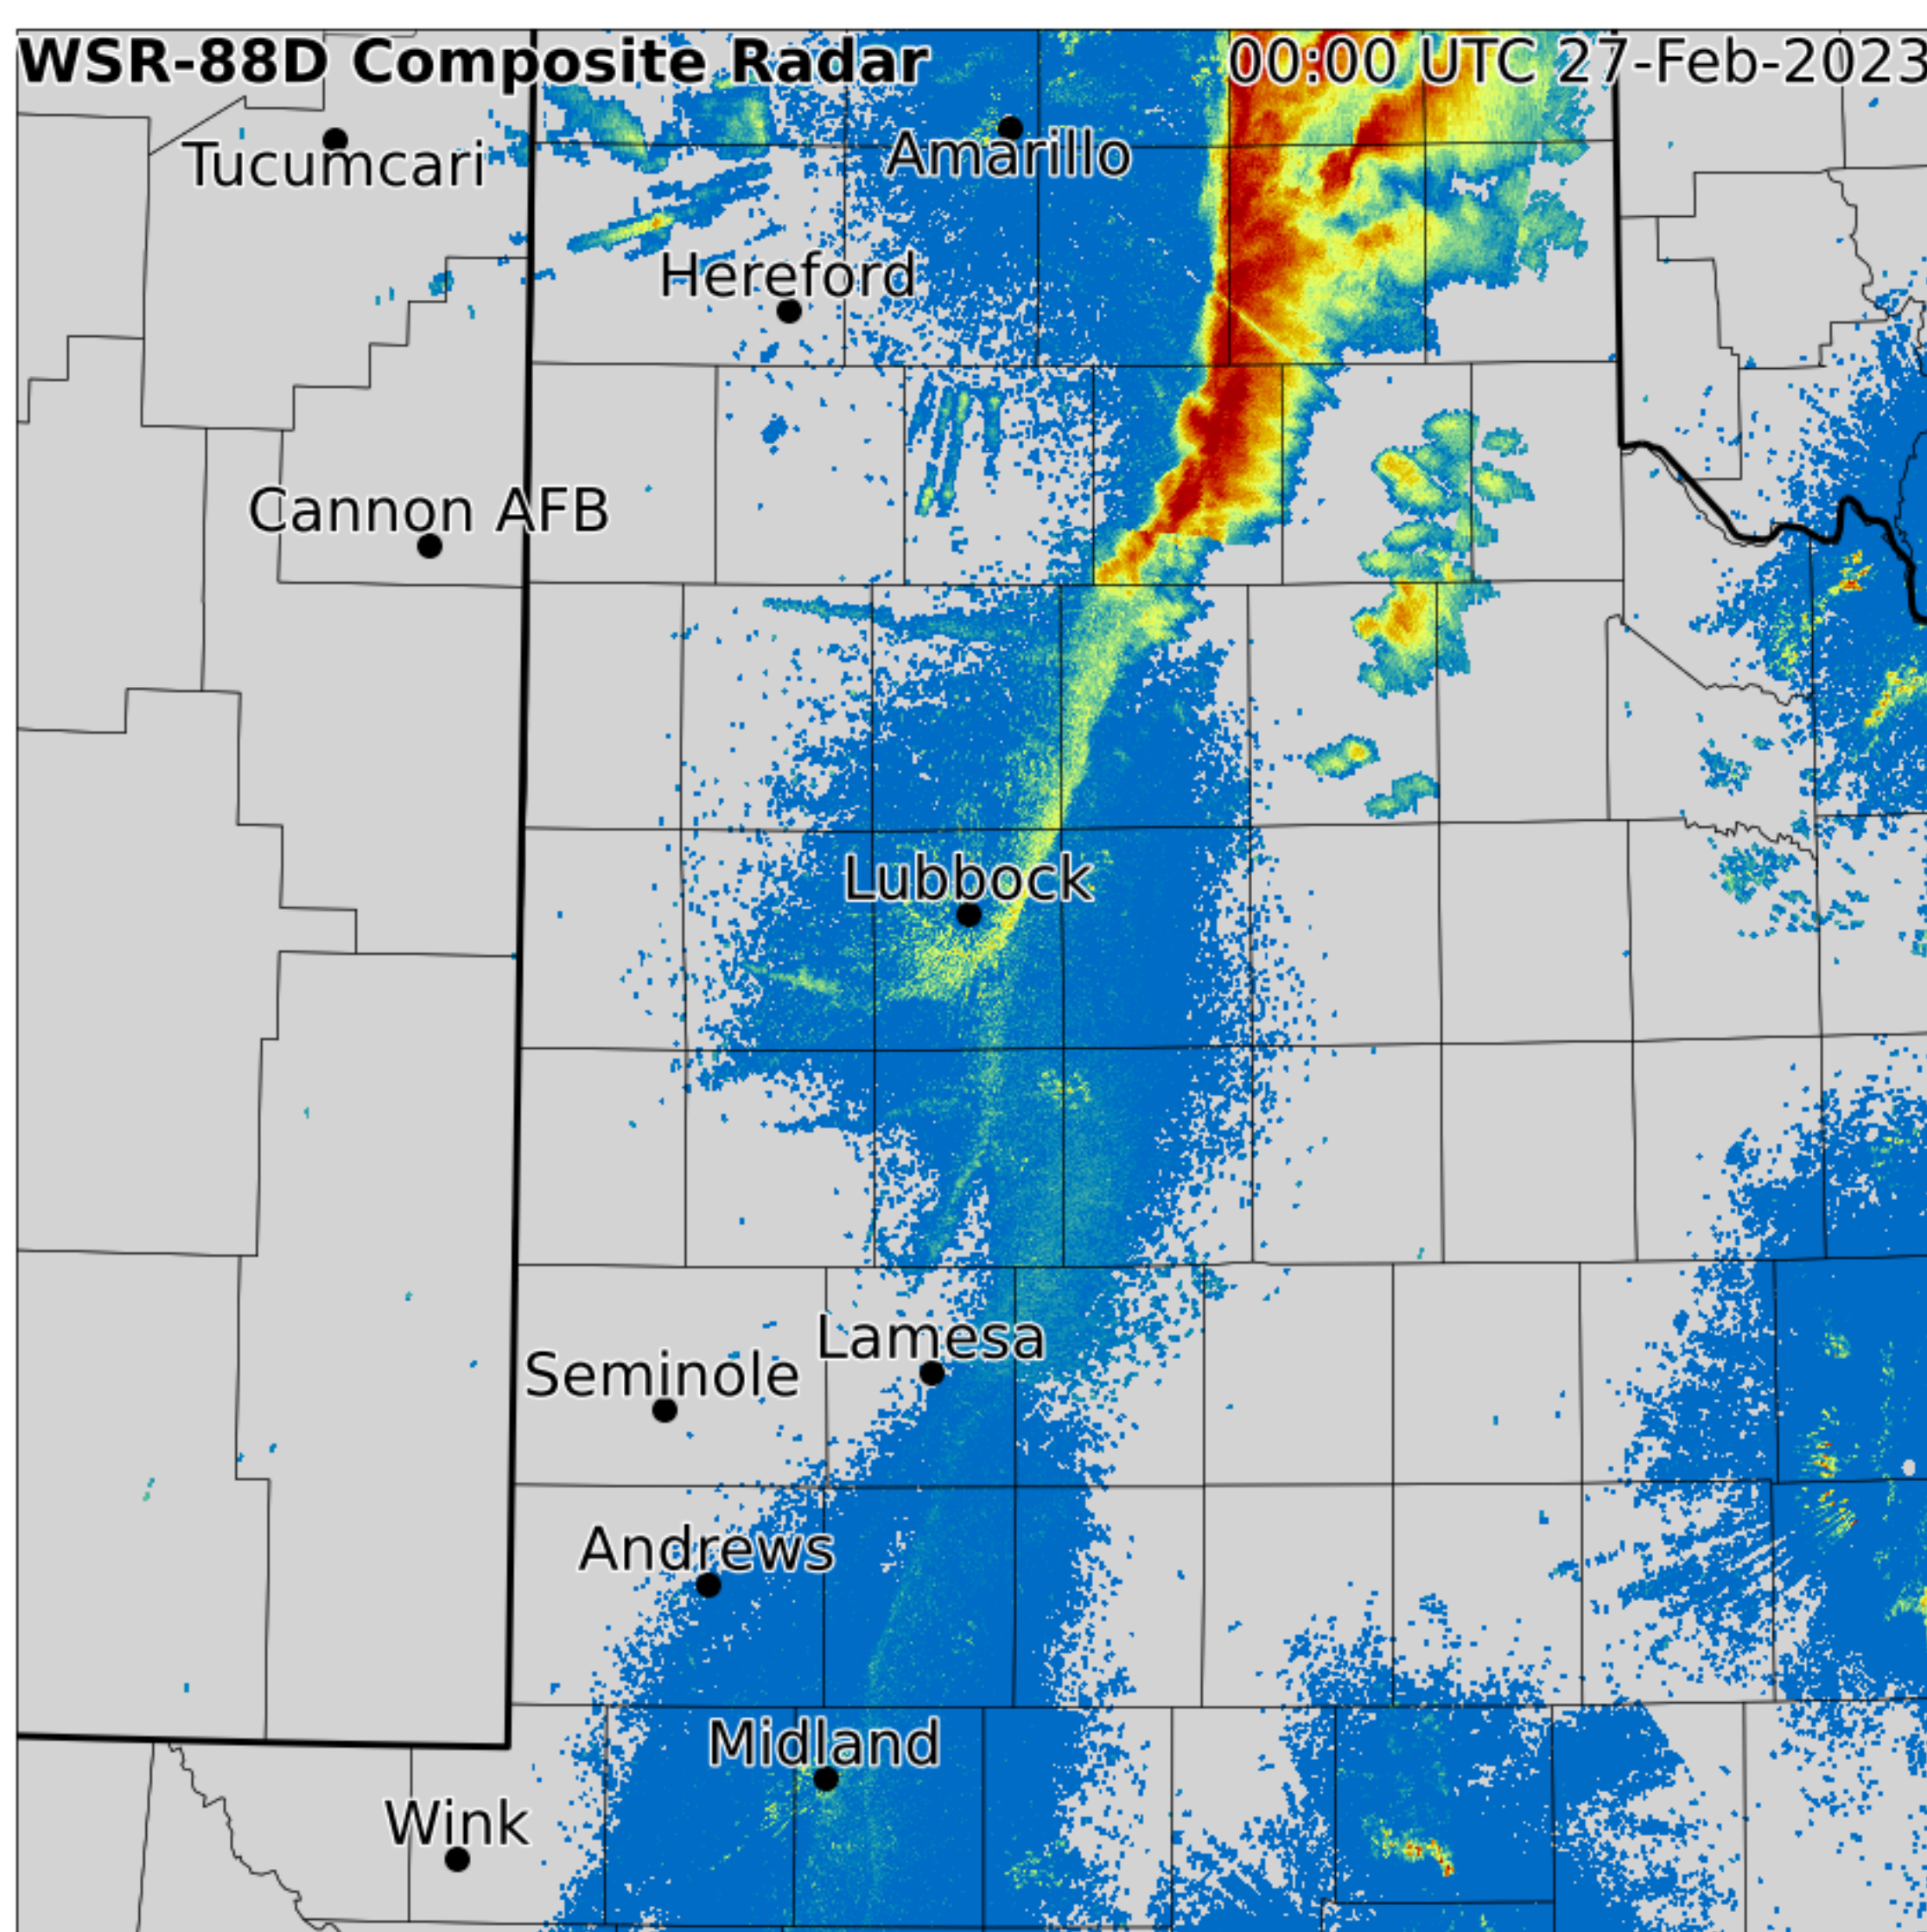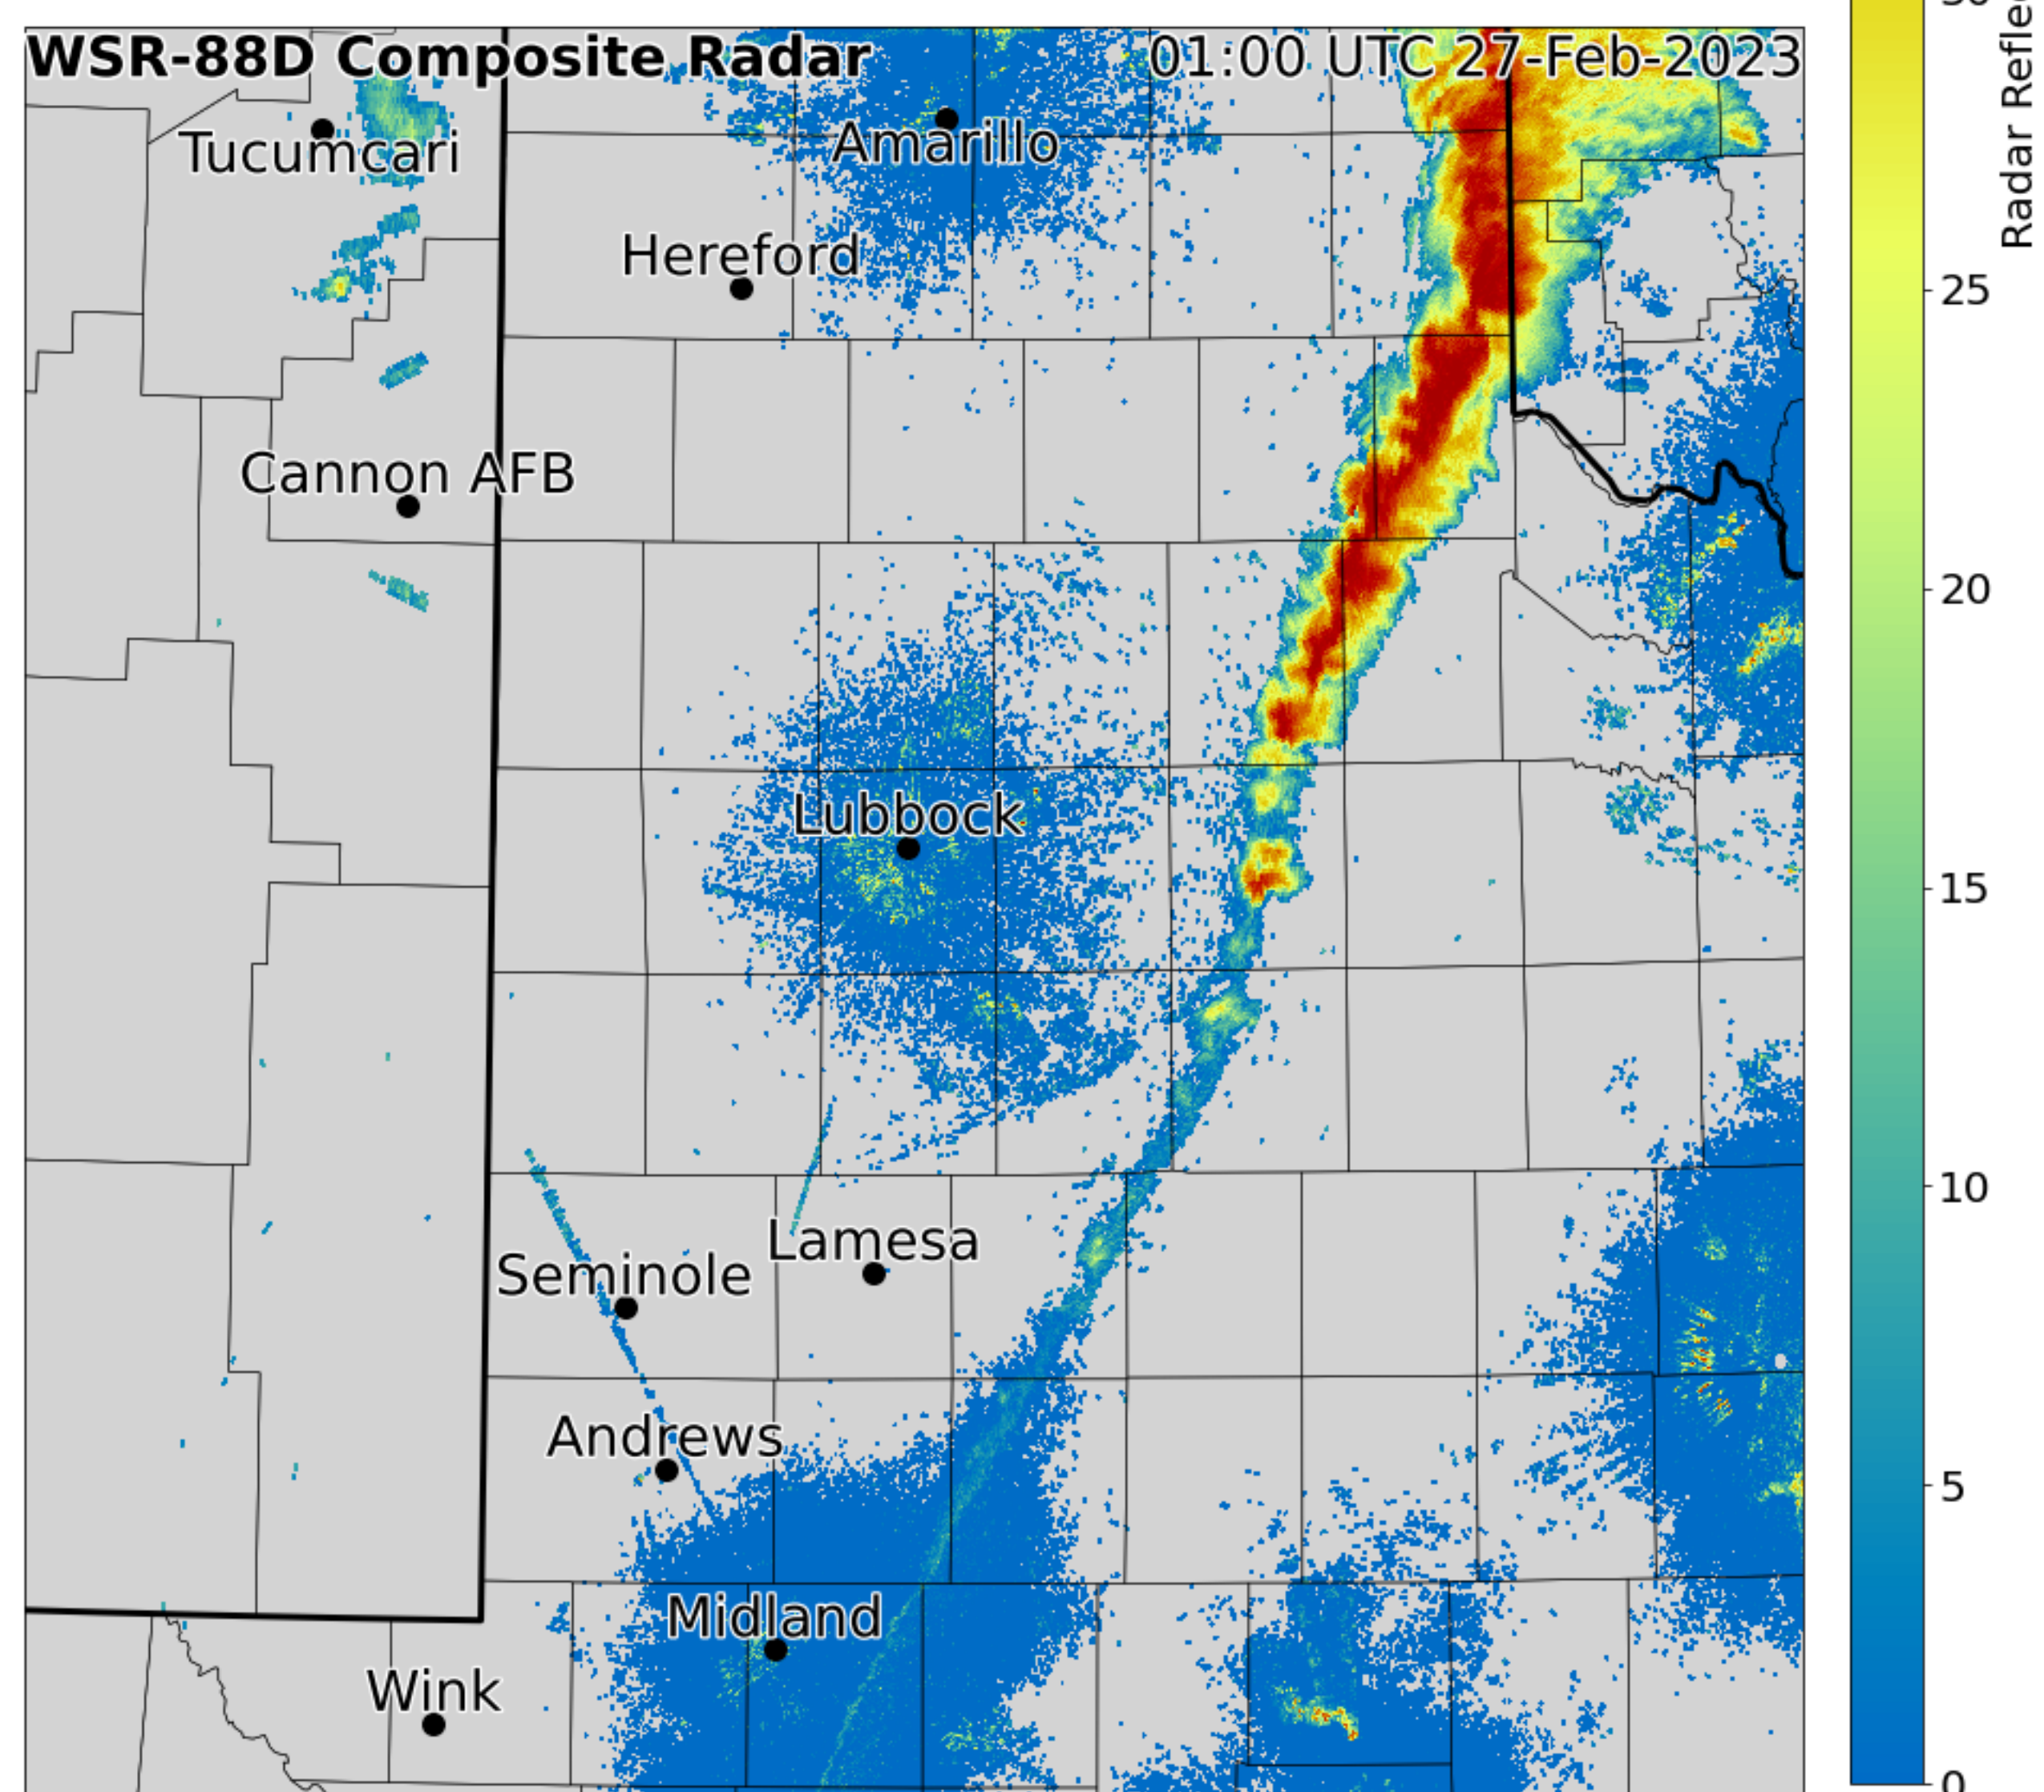

Supplement: Supplementary file 2 [file egusphere-2024-113-supplement.zip]

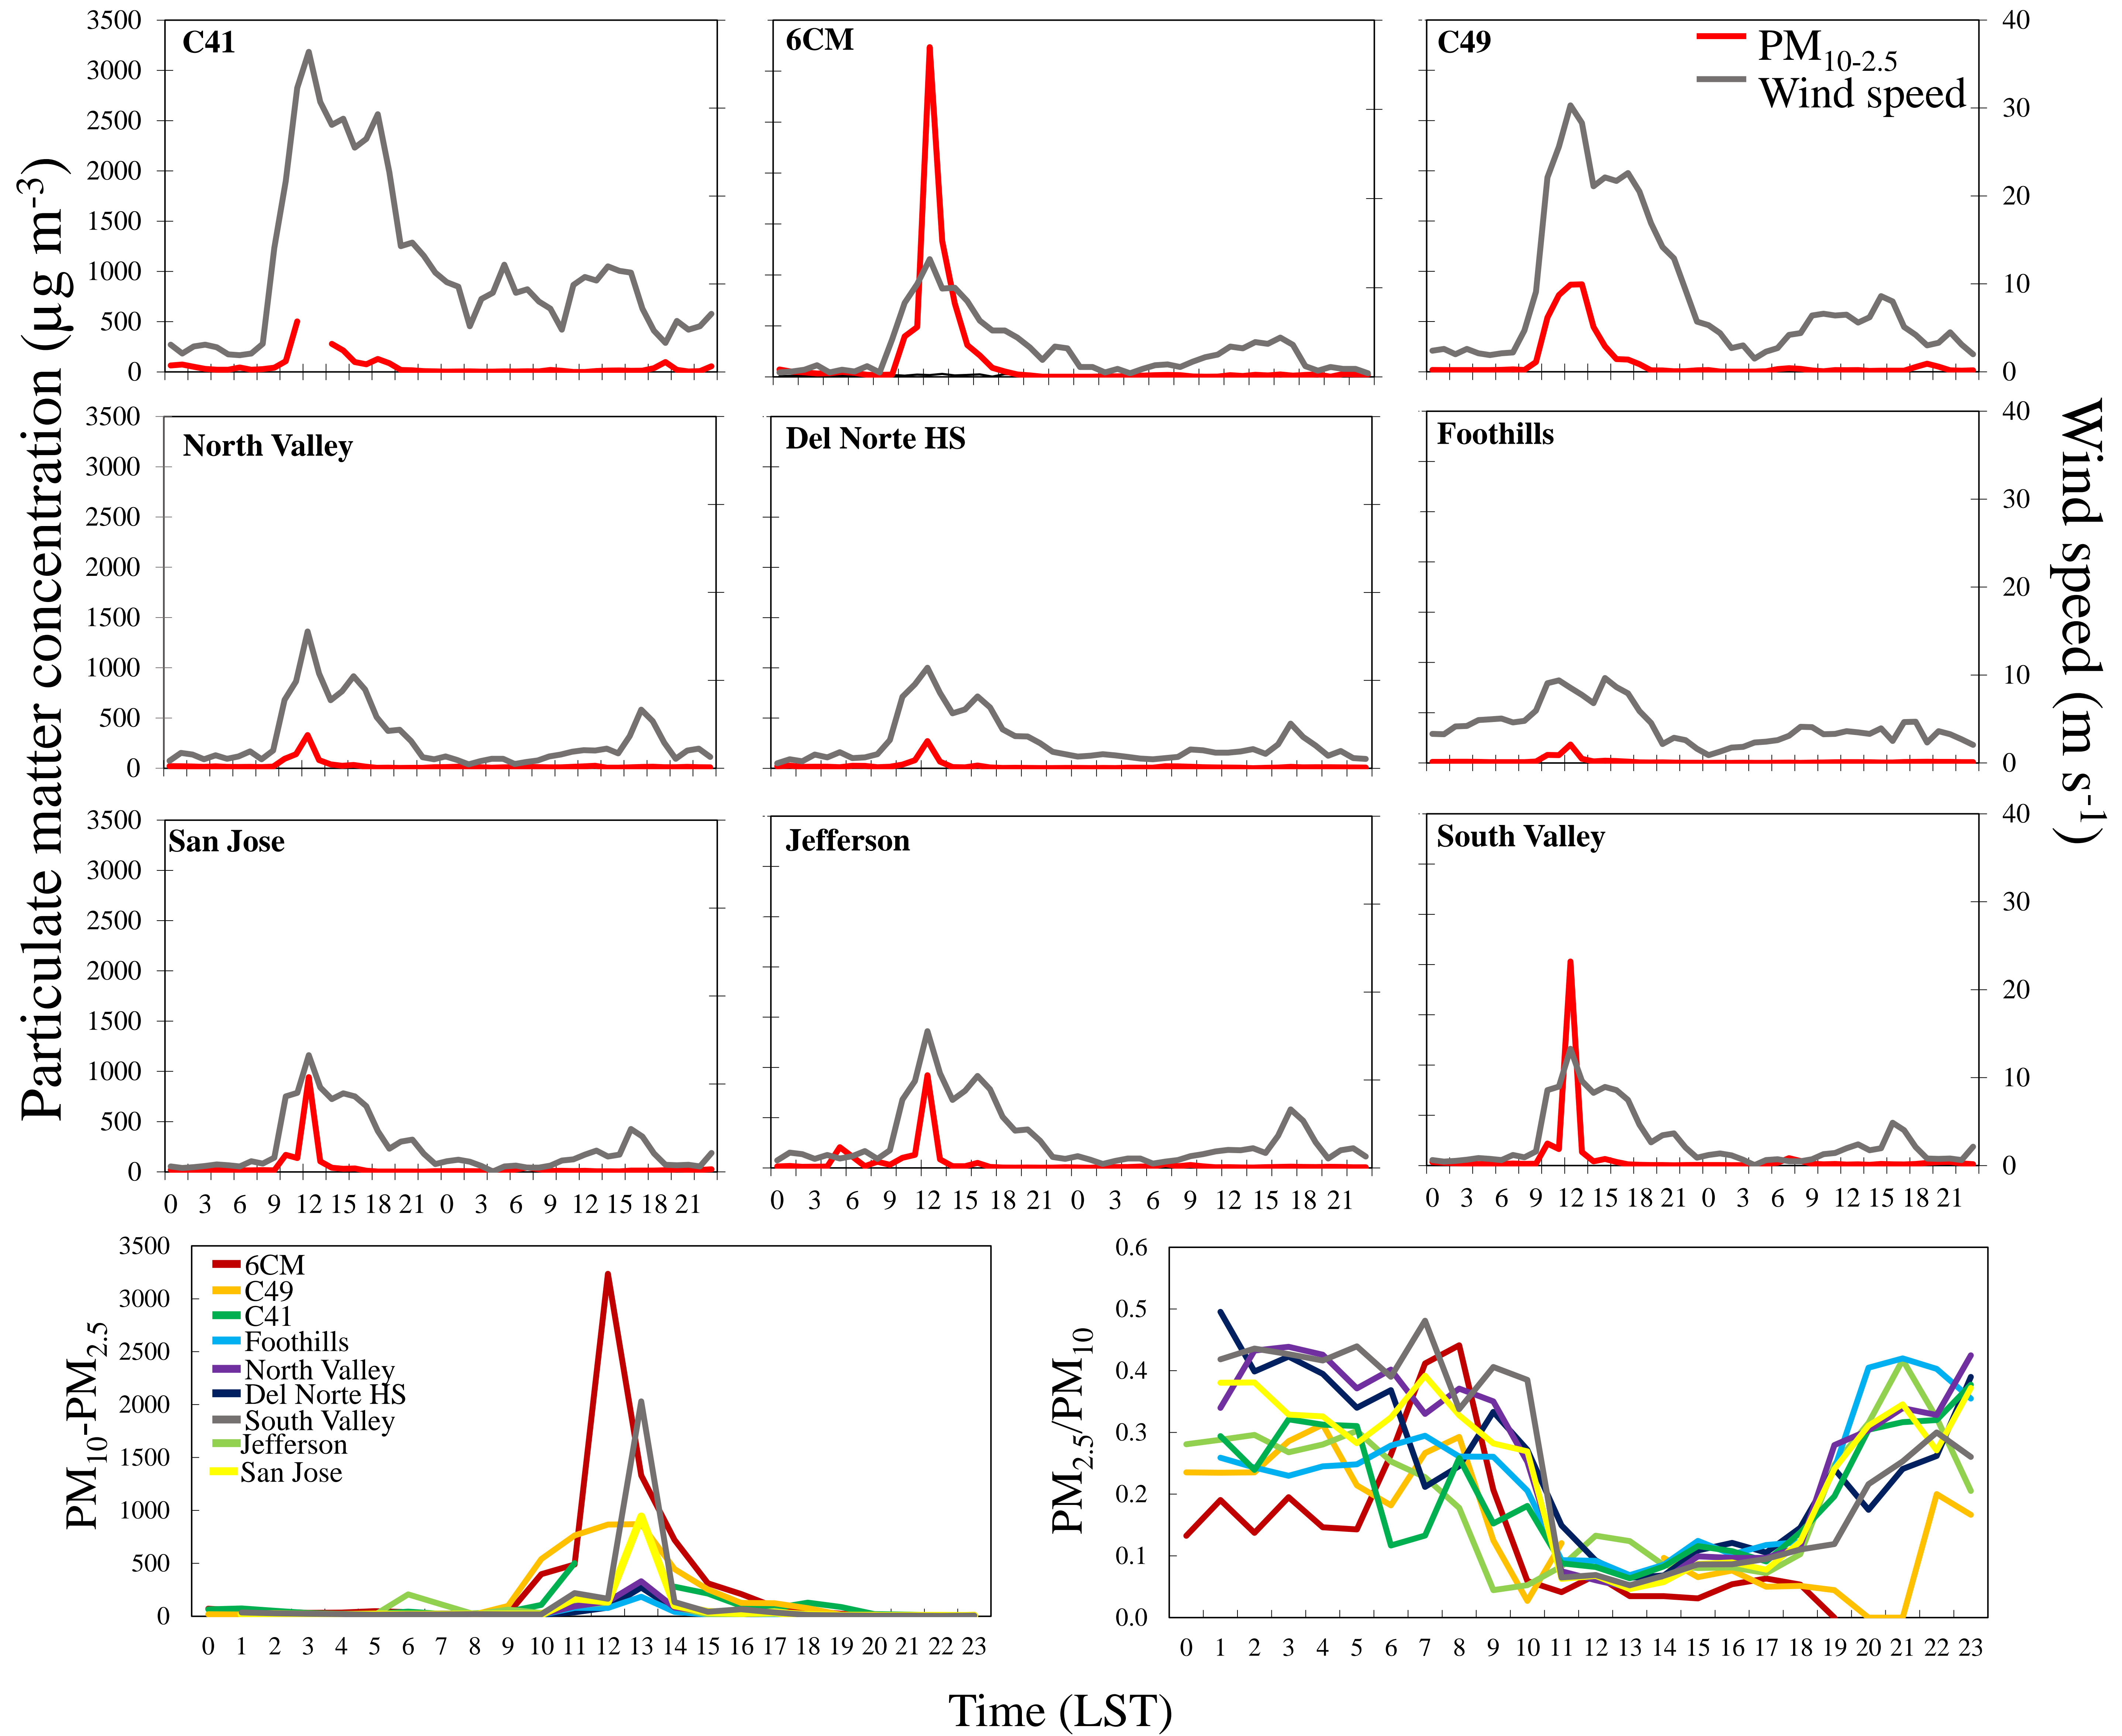

Supplement: Supplementary file 3 [file egusphere-2024-113-supplement.zip]
